# Supplementary material for: Preferences of the Public for Sharing Health Data: Discrete Choice Experiment
Source: PubMed Central journal article supplement (PMC8406119; doi:10.2196/29614), 2021-07-05

## Multimedia Appendix 1.

Relative importance score for respondents' preferences stratified on type of health information. The reason for the new data user was more important for genetics information compared to life-style information.

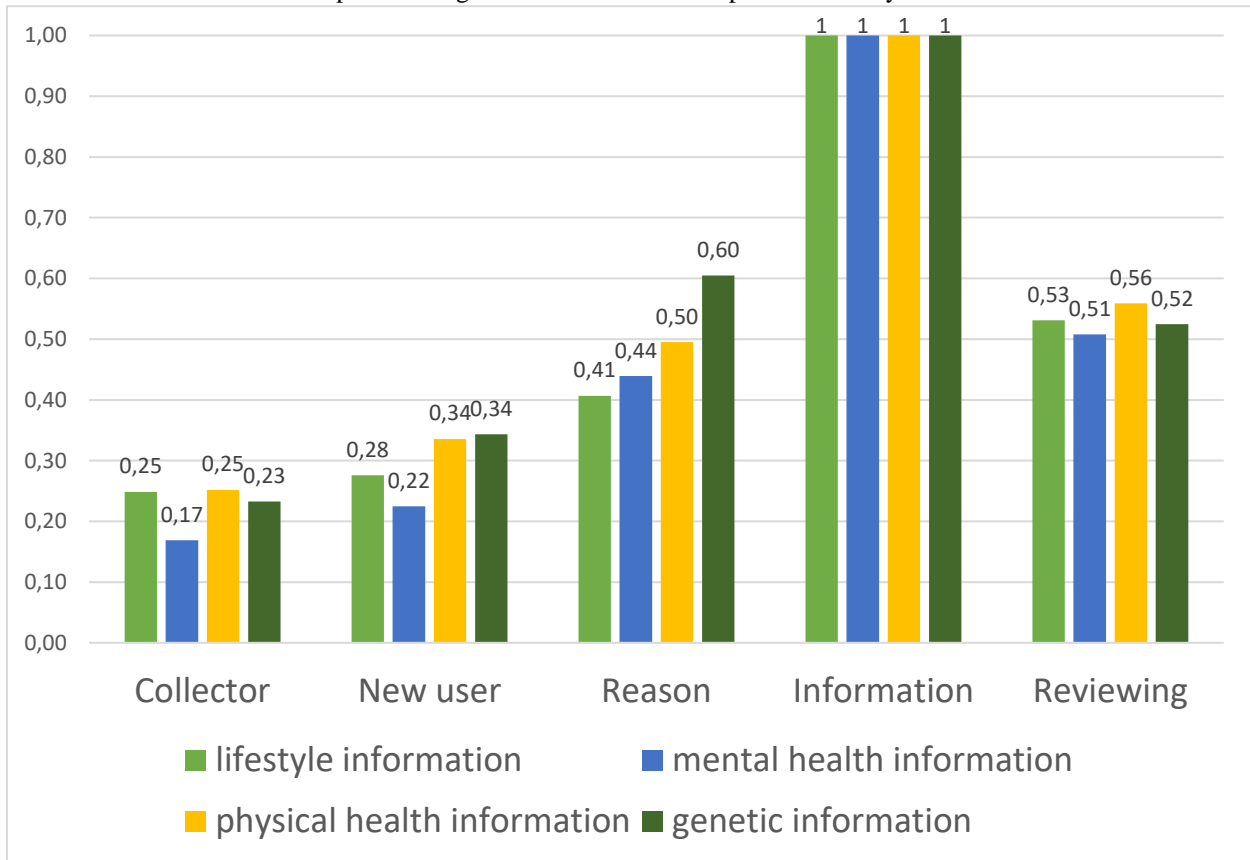

Supplement: medinform_v9i7e29614_app1.pdf [file medinform_v9i7e29614_app1.pdf]
