# Supplementary material for: Preferences of the Public for Sharing Health Data: Discrete Choice Experiment
Source: PubMed Central journal article supplement (PMC8406119; doi:10.2196/29614), 2021-07-05
Supplement: medinform_v9i7e29614_app2.pdf [file medinform_v9i7e29614_app2.pdf]

## Multimedia Appendix 2.

The acceptance uptake in percentage when health information is shared from *a technological company* to a *new technological company*.

|                                       | <b>Not informed,</b><br>% | <b>Informed,</b><br>% | <b>Opt out,</b><br>% | <b>Consent,</b><br>% |
|---------------------------------------|---------------------------|-----------------------|----------------------|----------------------|
| <b>No review</b>                      |                           |                       |                      |                      |
| Develop a new product or service      | 28                        | 43                    | 57                   | 58                   |
| Promoting or advertising or marketing | 14                        | 31                    | 48                   | 55                   |
| Investigate a policy initiative       | 25                        | 41                    | 56                   | 56                   |
| Evaluate the quality                  | 27                        | 44                    | 58                   | 58                   |
| <b>Review of use</b>                  |                           |                       |                      |                      |
| Develop a new product or service      | 40                        | 58                    | 71                   | 66                   |
| Promoting or advertising or marketing | 27                        | 46                    | 60                   | 60                   |
| Investigate a policy initiative       | 38                        | 56                    | 69                   | 68                   |
| Evaluate the quality                  | 40                        | 60                    | 71                   | 71                   |
| <b>Review of use and transfer</b>     |                           |                       |                      |                      |
| Develop a new product or service      | 40                        | 58                    | 71                   | 70                   |
| Promoting or advertising or marketing | 26                        | 46                    | 60                   | 59                   |
| Investigate a policy initiative       | 38                        | 56                    | 69                   | 68                   |
| Evaluate the quality                  | 40                        | 60                    | 71                   | 70                   |

The acceptance uptake in percentage when health information is shared to develop *a new product or service* and with *no review process*.

|                            | <b>Technological company,</b><br>% | <b>Pharmaceutical company,</b><br>% | <b>A research project,</b><br>% | <b>A national authority,</b><br>% |
|----------------------------|------------------------------------|-------------------------------------|---------------------------------|-----------------------------------|
| <b>Not informed</b>        |                                    |                                     |                                 |                                   |
| A technological company    | 24                                 | 31                                  | 29                              | 33                                |
| A research project         | 30                                 | 37                                  | 35                              | 39                                |
| Your healthcare provider   | 35                                 | 42                                  | 40                              | 44                                |
| <b>Informed</b>            |                                    |                                     |                                 |                                   |
| A technological company    | 39                                 | 44                                  | 43                              | 46                                |
| A research project         | 49                                 | 53                                  | 55                              | 56                                |
| Your healthcare provider   | 53                                 | 57                                  | 61                              | 61                                |
| <b>Informed opt-out</b>    |                                    |                                     |                                 |                                   |
| A technological company    | 48                                 | 52                                  | 56                              | 56                                |
| A research project         | 59                                 | 63                                  | 71                              | 69                                |
| Your healthcare provider   | 63                                 | 66                                  | 76                              | 74                                |
| <b>Information consent</b> |                                    |                                     |                                 |                                   |
| A technological company    | 46                                 | 50                                  | 54                              | 54                                |
| A research project         | 57                                 | 61                                  | 69                              | 68                                |
| Your healthcare provider   | 62                                 | 64                                  | 75                              | 73                                |
